# Supplementary material
Source: Springer Nature journal article supplement (https://www.springermedizin.de/resource/supplementary/12990_2009_233_MOESM4_ESM.pdf/9612848)

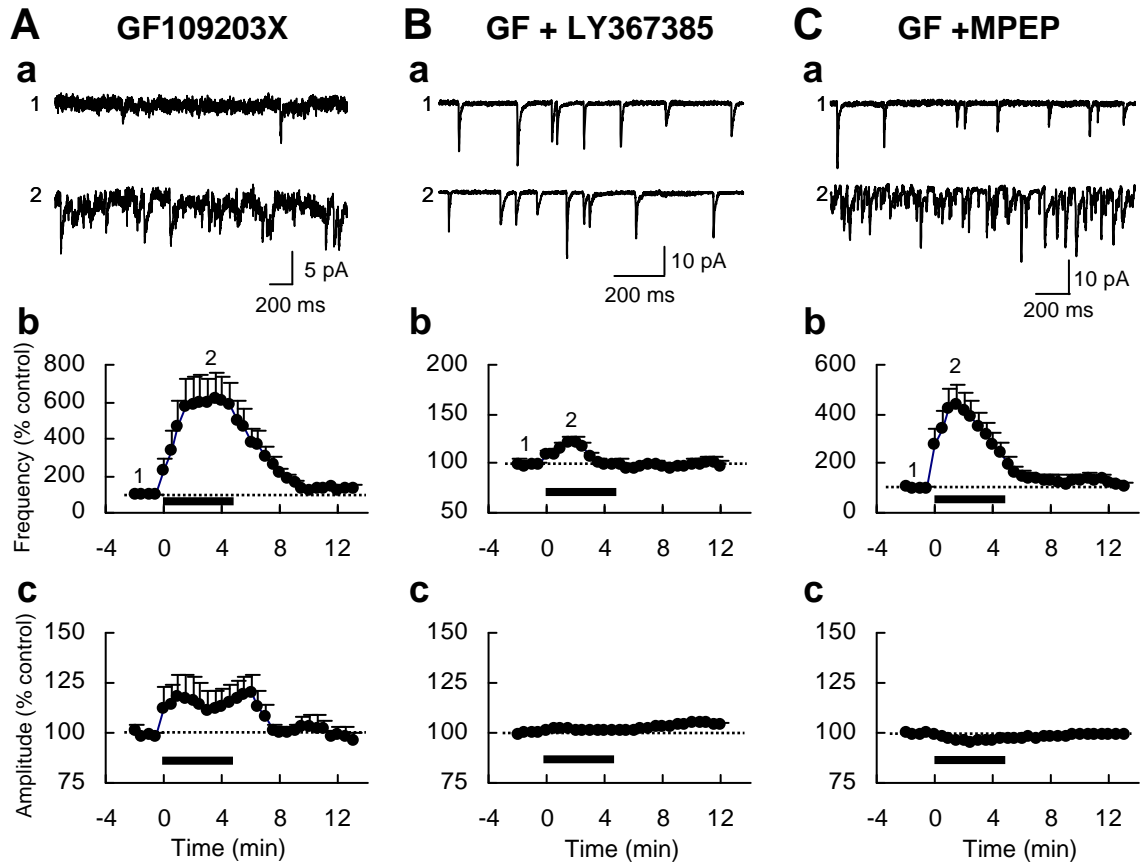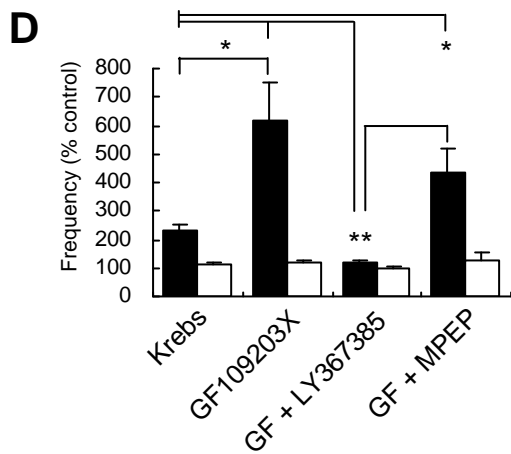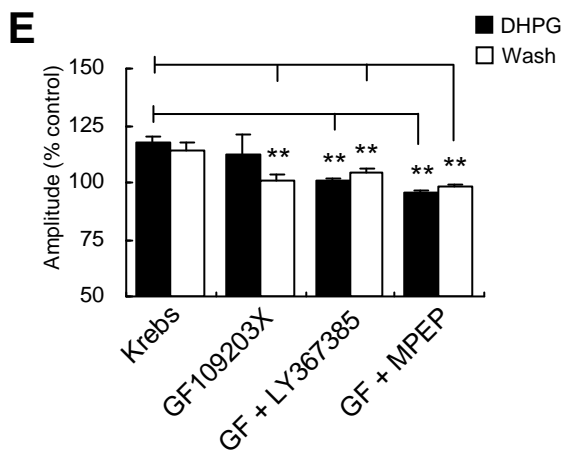

Supplement: MOESM4 [file 9612848]
